# Supplementary material
Source: MDPI journal article supplement (https://www.mdpi.com/2073-4441/14/16/2555)
Supplement: s1 [file s1]

## **Supplementary Materials**

The main software used to clean, store data, and estimate natural flows was MS Excel [76]. Then, for data completion and analysis, we developed the code for the QPPQ method [77], the Streamflow Drought Index (SDI)[78], and the correlation between the regulated and natural streamflow volumes using Spyder [79] as the main programming environment and Python [80] as the programming language. For the code we used a combination of packages for data analysis and data visualization including NumPy, Pandas, Matplotlib, and Seaborn [81]. To estimate the Fisher Information, we used the Python package csunlab/fisher-information [54] and the Mann-Kendall test was estimated using the Python package pyMannKendall [82].
